# Supplementary material
Source: Frontiers journal article supplement (https://www.frontiersin.org/articles/269823)
Supplement: Image_3.PDF [file Image_3.PDF]

A

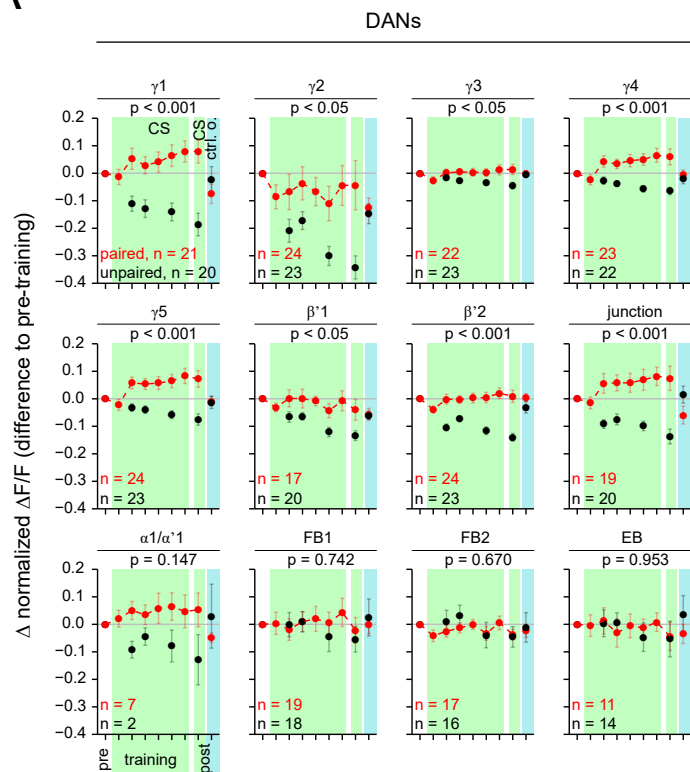

B

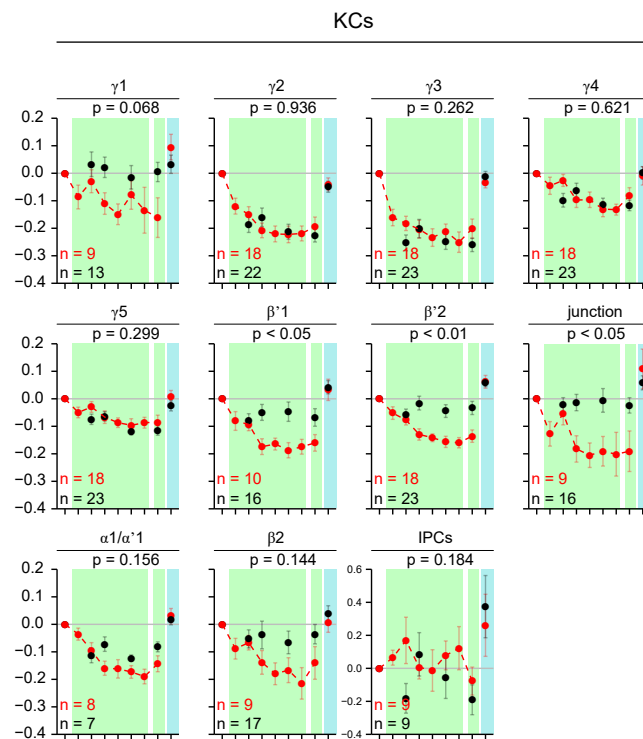

C

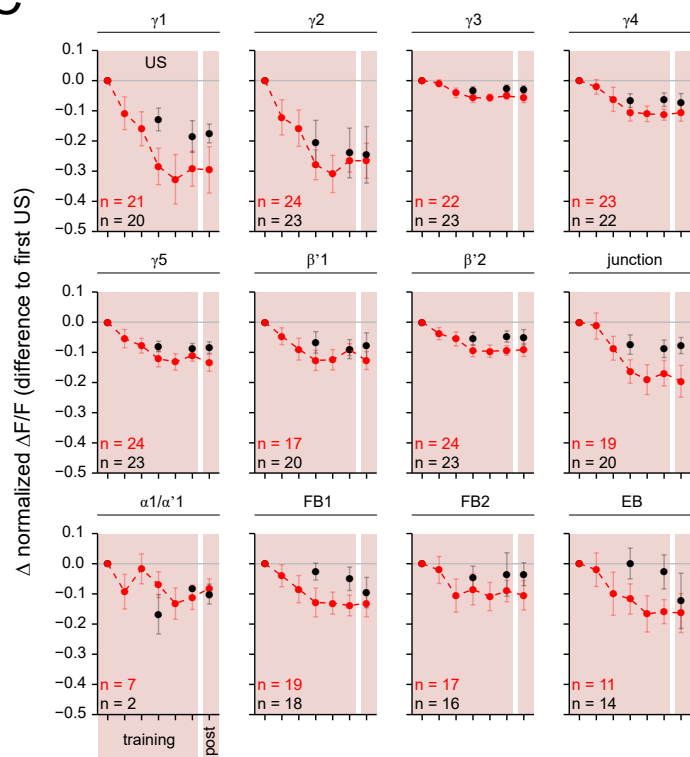

D

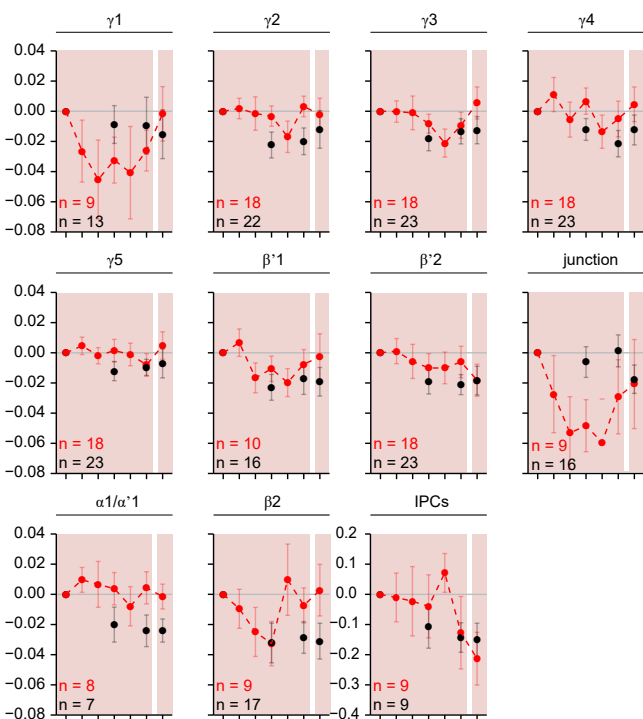

E

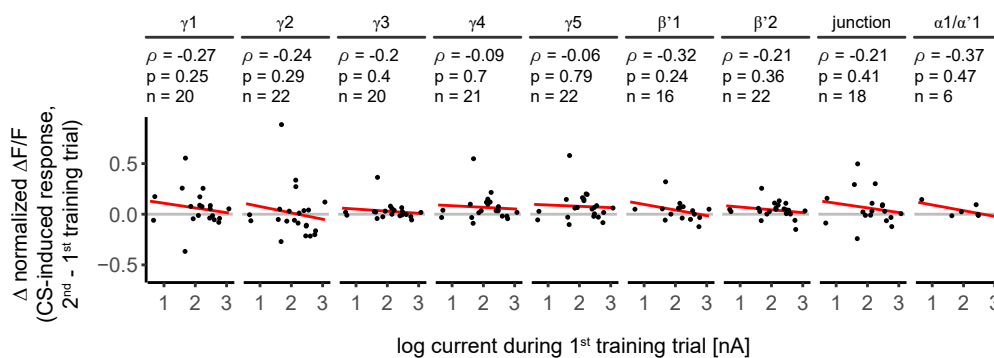

Figure S3
